# Supplementary material
Source: HighWire-hosted journal article supplement (https://tobaccocontrol.bmj.com/highwire/filestream/166248/field_highwire_adjunct_files/3/tc-2022-057905supp004_data_supplement.pdf)
Supplement: tc-2022-057905supp004_data_supplement.pdf [file tc-2022-057905supp004_data_supplement.pdf]

**Table S1:** Characteristics of adults and youth in the Population Assessment of Tobacco and Health (PATH) study in 2015–2017 (Waves 2–4) and 2017–2019 (Waves 4–5), given as numbers (N) and weighted percentages (%).

|                                     | Youth Waves 2-4 |       | Youth Waves 4-5 |       | Adults Waves 2-4 |       | Adults Waves 4-5 |       |
|-------------------------------------|-----------------|-------|-----------------|-------|------------------|-------|------------------|-------|
|                                     | %               | N     | %               | N     | %                | N     | %                | N     |
| Total                               | 100             | 12067 | 100             | 12538 | 100              | 24242 | 100              | 28061 |
| Gender                              |                 |       |                 |       |                  |       |                  |       |
| Female                              | 48.6            | 5861  | 49.0            | 6054  | 52.1             | 12591 | 62.0             | 13522 |
| Male                                | 51.3            | 6206  | 51.0            | 6484  | 47.9             | 11651 | 48.0             | 14539 |
| Race/ethnicity                      |                 |       |                 |       |                  |       |                  |       |
| Non-Hispanic White                  | 51.9            | 5509  | 51.2            | 5528  | 64.3             | 13991 | 63.7             | 15840 |
| Non-Hispanic Black                  | 22.9            | 3504  | 22.9            | 3741  | 15.3             | 4544  | 15.5             | 5505  |
| Hispanic                            | 12.7            | 1586  | 12.7            | 1635  | 11.1             | 3543  | 11.0             | 4171  |
| Non-Hispanic Other/Unknown          | 12.5            | 1468  | 13.2            | 1634  | 9.3              | 2164  | 9.8              | 2545  |
| Age (years)                         |                 |       |                 |       |                  |       |                  |       |
| 12-14                               | 57.5            | 7123  | 49.2            | 6254  |                  |       |                  |       |
| 15-17                               | 42.5            | 4944  | 50.8            | 6284  |                  |       |                  |       |
| 18-24                               |                 |       |                 |       | 14.3             | 7929  | 12.2             | 8891  |
| 25-34                               |                 |       |                 |       | 17.5             | 4581  | 17.9             | 5794  |
| 35-54                               |                 |       |                 |       | 33.2             | 6719  | 33.3             | 7470  |
| 55+                                 |                 |       |                 |       | 35.0             | 5013  | 36.5             | 5906  |
| Tobacco & ENDS use state            |                 |       |                 |       |                  |       |                  |       |
| Never established use               | 96.6            | 11692 | 96.2            | 12066 | 58.8             | 11968 | 57.9             | 13894 |
| Non-current use                     | 1.1             | 127   | 1.4             | 183   | 21.8             | 4079  | 23.1             | 5323  |
| Cigarette-only use                  | 1.0             | 116   | 0.7             | 92    | 16.4             | 6875  | 16.0             | 7365  |
| Non-daily                           | 0.5             | 59    | 0.4             | 49    | 3.4              | 1320  | 3.2              | 1425  |
| Daily                               | 0.5             | 57    | 0.3             | 43    | 13.1             | 5555  | 12.8             | 5940  |
| ENDS-only use                       | 1.0             | 99    | 1.4             | 169   | 1.3              | 564   | 1.5              | 758   |
| Non-daily                           | 0.8             | 77    | 1.2             | 144   | 0.4              | 208   | 0.4              | 249   |
| Daily                               | 0.2             | 22    | 0.2             | 25    | 0.9              | 356   | 1.1              | 509   |
| Dual cigarette and ENDS use         | 0.3             | 33    | 0.2             | 28    | 1.7              | 756   | 1.5              | 721   |
| Non-daily cigarette, non-daily ENDS | 0.1             | 16    | 0.1             | 16    | 0.2              | 92    | 0.2              | 100   |
| Non-daily cigarette, daily ENDS     | 0.1             | 6     | 0.0             | 3     | 0.3              | 142   | 0.4              | 168   |
| Daily cigarette, non-daily ENDS     | 0.1             | 8     | 0.0             | 5     | 0.8              | 362   | 0.6              | 316   |
| Daily cigarette, daily ENDS         | 0.0             | 3     | 0.0             | 4     | 0.4              | 160   | 0.3              | 137   |
